# Supplementary material for: A home-made nanoporous gold microsensor for lead(ii) detection in seawater with high sensitivity and anti-interference properties
Source: Royal Society of Chemistry journal article supplement (doi:10.1039/d4ay00698d), 2024-01-01
Supplement: d4ay00698d1.pdf [file d4ay00698d1.pdf]

## A home-made nanoporous gold microsensor for lead (II) detection in seawater with high sensitivity and anti-interference property

Renato Soares de Oliveira Lins,<sup>a</sup> Anandhakumar Sukeri <sup>\*b</sup> and Mauro Bertotti <sup>\*a</sup>

<sup>a</sup> *Department of Fundamental Chemistry, Institute of Chemistry, University of São Paulo (USP), Av. Prof. Lineu Prestes, 748, CEP: 05508-000, São Paulo - SP, Brazil. Email: mbertott@iq.usp.br*

<sup>b</sup> *Department of Chemistry, SRM Institute of Science and Technology (SRMIST), Kattankulathur-603 203, Tamil Nadu, India. Email: anandhas2@srmist.edu.in*

### Supporting Information

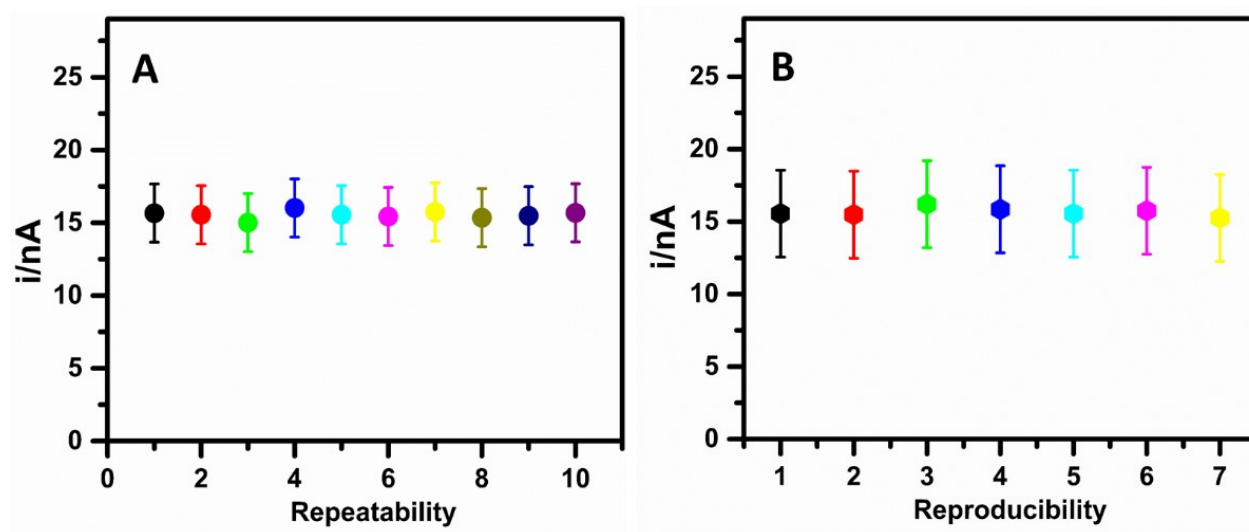

Fig. S1. Repeatability and reproducibility data obtained for Pb(II) detection using the NPG- $\mu$ E.

**Table. S1.** Comparison of the analytical performance of electrochemical sensors for Pb(II) determination

| Electrodes                             | Methods      | Linear range                 | Detection limits (nM) | Ref.             |
|----------------------------------------|--------------|------------------------------|-----------------------|------------------|
| Au-Bi bimetallic nanoparticles         | DAPSV        | 0.1–500 $\mu\text{g L}^{-1}$ | 50.0                  | 1                |
| Bi/Au $\mu\text{E}$                    | SWASV        | 40-6700 nM                   | 12.5                  | 2                |
| Bi/CFME                                | SWASV        | 50-350 nM                    | 10.0                  | 3                |
| GA-CTS-CNTPE                           | SWAdSV       | 99-2000 nM                   | 57.0                  | 4                |
| In-situ Bi/CFME                        | SWASV        | 50-500 nM                    | 32.0                  | 5                |
| <b>NPG/Au-<math>\mu\text{E}</math></b> | <b>SWASV</b> | <b>100-10000 nM</b>          | <b>57.0</b>           | <b>This work</b> |

1. W.J. Wang , X.Y. Lu , F.Y. Kong, H.Y. Li, Z.X. Wang, W. Wang, *Microchemical Journal*, 2022, **175**, 107078.
2. M.O. Salles, A.P.R. Souza, J. Naozuka, P.V. Oliveira, M. Bertotti, *Electroanalysis*, 2009, **21**, 1439 – 1442.
3. R.C. Peña, L. Cornejo, M. Bertotti, C.M.A. Brett, *Anal. Methods*, 2018,**10**, 3624-3630
4. F.C. Vicentini, T.A. Silva, A. Pellatieri, B. C. Janegitz, O.F. Filho, R.C.Faria, *Microchemical Journal*, 2014, **116**,191-196.
5. S. Anandhakumar, J. Mathiyarasu, K.L.N. Phani, *Indian J. Chemistry*, 2012, **51A**, 699-703.

**Table. S2.** Validation of the analytical performance with a comparative technique atomic absorption spectroscopy (AAS)).

| Samples | AAS                     |                         |              | SWASV                   |                         |              |
|---------|-------------------------|-------------------------|--------------|-------------------------|-------------------------|--------------|
|         | Added ( $\mu\text{M}$ ) | Found ( $\mu\text{M}$ ) | Recovery (%) | Added ( $\mu\text{M}$ ) | Found ( $\mu\text{M}$ ) | Recovery (%) |
| 1       | 1                       | 1.02                    | 102.0        | 1                       | 0.99                    | 99.0         |
| 2       | 3                       | 2.98                    | 99.3         | 3                       | 3.05                    | 98.4         |
| 3       | 5                       | 4.94                    | 98.8         | 5                       | 5.07                    | 101.4        |
